1 **The Temporal Pattern of Spiking Activity of a Thalamic Neuron are Related to the**

2 **Amplitude of the Cortical Local Field Potential**

3

4 **Abbreviated title:** Thalamic spikes and cortical local field potential

5

6 **Hiroshi Tamura**<sup>1,2</sup>

7 <sup>1</sup>Graduate School of Frontier Biosciences, Osaka University, Suita, Osaka 565-0871, Japan

8 <sup>2</sup>Center for Information and Neural Networks, Suita, Osaka 565-0871, Japan

9

10 **Author contributions:** HT designed the research, conducted experiments, analyzed data, and

11 wrote the paper.

12

13 **Corresponding author:** Dr. Hiroshi Tamura

14 Laboratory for Cognitive Neuroscience, Graduate School of Frontier Biosciences, Osaka

15 University, 1-4 Yamadaoka, Suita, Osaka 565-0871, Japan

16 Tel: +81-6-6879-7969; Fax: +81-6-6879-4439; E-mail: [tamura@fbs.osaka-u.ac.jp](mailto:tamura@fbs.osaka-u.ac.jp)

17

18 **Number of pages:** 43

19 **Number of figures:** 7

20 **Number of tables:** 0

21 **Word counts:** Abstract, 218 (250); Introduction, 648 (650); Discussion, 1396 (1500)

22

23 **Conflict of interest:** The authors declare no competing financial interests.

24

25 **Acknowledgments:** I thank Dr. Fumitaka Kimura for his encouragement and for critically  
26 reading the manuscript, and J. Ludovic Croxford, PhD, from Edanz (<https://jp.edanz.com/ac>) for  
27 editing a draft of this manuscript. This work was supported by Grant-in-Aids for Scientific  
28 Research on Innovative Areas—“Innovative SHITSUKAN Science and Technology”  
29 (15H05921) and “Non-linear Neuro-Oscillology” (16H01612) from MEXT, Japan— and by a  
30 Grant-in-Aid for Scientific Research (C) (17K07056).

31

32 **Abstract**

33 Neuron activity in the sensory cortices mainly depends on feedforward thalamic inputs. High-  
34 frequency activity of a thalamic input can be temporally integrated by a neuron in the sensory  
35 cortex and is likely to induce larger depolarization. However, feedforward inhibition (FFI) and  
36 depression of excitatory synaptic transmission in thalamocortical pathways attenuate  
37 depolarization induced by the latter part of high-frequency spiking activity and the temporal  
38 summation may not be effective. The spiking activity of a thalamic neuron in a specific  
39 temporal pattern may circumvent FFI and depression of excitatory synapses. The present study  
40 determined the relationship between the temporal pattern of spiking activity of a single thalamic  
41 neuron and the degree of cortical activation as well as that between the firing rate of spiking  
42 activity of a single thalamic neuron and the degree of cortical activation. Spiking activity of a  
43 thalamic neuron was recorded extracellularly from the lateral geniculate nucleus (LGN) in male  
44 Long-Evans rats. Degree of cortical activation was assessed by simultaneous recording of local  
45 field potential (LFP) from the visual cortex. A specific temporal pattern appearing in three  
46 consecutive spikes of an LGN neuron induced larger cortical LFP modulation than high-  
47 frequency spiking activity during a short period. These findings indicate that spiking activity of  
48 thalamic inputs is integrated by a synaptic mechanism sensitive to an input temporal pattern.

49

50 **Significance Statement**

51 Sensory cortical activity depends on thalamic inputs. Despite the importance of thalamocortical  
52 transmission, how spiking activity of thalamic inputs is integrated by cortical neurons remains  
53 unclear. Feedforward inhibition and synaptic depression of excitatory transmission may not  
54 allow simple temporal summation of membrane potential induced by consecutive spiking  
55 activity of a thalamic neuron. A specific temporal pattern appearing in three consecutive spikes  
56 of a thalamic neuron induced larger cortical local field potential modulation than high-  
57 frequency spiking activity during a short period. The findings indicate the importance of the  
58 temporal pattern of spiking activity of a single thalamic neuron on cortical activation.

59

60 **Introduction**

61 The activity of neurons in sensory cortices mainly depends on feedforward thalamic inputs  
62 (Ferster et al., 1996; Chung and Ferster, 1998; Liu et al, 2007; Li et al., 2013; Lien and Scanziani,  
63 2013). Because a single thalamic spike induces a small depolarization in the postsynaptic cortical  
64 neuron (Gil et al., 1999; Stratford et al., 1996; Brecht and Sakmann, 2002; Bruno and Sakmann,  
65 2006; Lien and Scanziani, 2018; Sedigh-Sarvestani et al., 2019; Ringach, 2021), synaptic inputs  
66 should be summated to allow the membrane potential to reach the spiking threshold. Synaptic  
67 inputs can be summated temporally (Magee, 2000; Feldmeyer et al., 2002). If this is the case in  
68 thalamocortical synapses, high-frequency spiking activity during the short period of a thalamic  
69 neuron is associated with larger cortical activation than that of a single spike (Usrey et al., 2000).

70 However, the presence of feedforward inhibition (FFI) at thalamocortical synapses  
71 (Ferster and Lindström, 1983; Gil and Amitai, 1996; Swadlow, 2002; Beierlein et al., 2003;  
72 Gabernet et al., 2005; Kimura et al., 2010; Ji et al., 2016; Bereshpolova et al., 2020) may not  
73 allow effective temporal summation of thalamic inputs by a cortical neuron. Thalamocortical  
74 relay neurons directly synapse onto inhibitory cortical neurons that inhibit cortical layer 4  
75 neurons (Gil and Amitai, 1996; Beierlein et al., 2003; Gabernet et al., 2005; Kimura et al.,  
76 2010). Thus, FFI creates a short temporal window for synaptic integration (Gabernet et al.,  
77 2005; Kimura et al., 2010) and suppresses depolarization induced by the latter part of high-  
78 frequency spiking activity from thalamocortical relay neurons. Furthermore, the efficacy of  
79 thalamocortical excitatory synapses is depressed during repetitive activation of thalamic inputs,  
80 with subsequent spikes of a thalamic neuron inducing much smaller depolarization than the first  
81 spike (Gil et al., 1997; Feldmeyer et al., 2002; Beierlein et al., 2003). Therefore, the high-

82 frequency spiking activity of a thalamic neuron is not as effective as that expected from the  
83 simple temporal summation of excitatory synaptic inputs.

84 The spiking activity of a thalamic neuron in a specific temporal pattern may circumvent  
85 the FFI and depression of thalamocortical excitatory synapses. For example, during a long  
86 period of silence of a thalamic neuron, the inhibitory current induced by FFI was decreased and  
87 the depression of excitatory synapses was alleviated. Indeed, a single spike after a long period  
88 of silence of a thalamic neuron was associated with large cortical activation (Swadlow and  
89 Gusev, 2001; Swadlow, 2002; Swadlow et al., 2002; Stoelzel et al., 2008; Stoelzel et al., 2009),  
90 suggesting specific temporal patterns of a single thalamic neuron can be used to ensure  
91 thalamocortical transmission.

92 The present study examined whether the firing rate or temporal pattern of spiking activity  
93 of a single thalamic neuron was related to the degree of cortical activation. The spiking activity  
94 of a thalamic neuron was extracellularly recorded from the lateral geniculate nucleus (LGN)  
95 with simultaneous recording of local field potential (LFP) from the visual cortex (VC) in male  
96 Long-Evans rats. LFPs represent neural activity from a cortical region of a few millimeters  
97 (Mitzdorf, 1987; Logothetis, 2003; Kreiman et al., 2006; Jin et al., 2008; Nauhaus et al., 2009;  
98 Kajikawa and Schroeder, 2011; Buzsáki et al., 2012; Pesaran et al., 2018), and are linearly  
99 related to the membrane potential and firing rate of cortical neurons (Deweese and Zador, 2004;  
100 Poulet and Petersen, 2008; Okun et al., 2010; Lien and Scanziani, 2013). To examine the  
101 relationship between the spiking activity of an LGN neuron and cortical LFP, the LGN spike-  
102 triggered average (STA) of LFP was calculated. Although both firing rate and temporal pattern  
103 of spiking activity of an LGN neuron were related to amplitude of STA-LFP recorded from VC,

104 a specific temporal pattern of spiking activity appearing in three consecutive spikes of an LGN  
105 neuron induced larger LFP modulation recorded from VC than high-frequency spiking activity  
106 during the short period. The importance of temporal pattern was confirmed with the analysis of  
107 monosynaptically connected LGN-VC neuron pairs.

108

## 109 **Materials and Methods**

110 The general experimental procedures were previously described (Kimura et al., 2010; Ikezoe et  
111 al., 2012). Neuronal activity was recorded from 17 adult male Long-Evans rats (260–360 g  
112 bodyweight). All experiments were performed in accordance with the guidelines of the National  
113 Institute of Health (1996) and the Japan Neuroscience Society, and were approved by the Osaka  
114 University Animal Experiment Committee (FBS-18-003).

115

### 116 *Neuronal activity recording*

117 Rats were anesthetized using urethane (Sigma-Aldrich, Tokyo, Japan; 1.2–1.4 g/kg, intra-  
118 peritoneal injection) with urethane supplementation if necessary. The head was restrained with  
119 ear bars coated with local anesthetic (2% lidocaine; AstraZeneca, Osaka, Japan). Local  
120 anesthetic (0.5% lidocaine; Maruishi, Osaka, Japan) was administered into the scalp before  
121 incision. A small hole (approximately 4 mm in diameter) was drilled in an appropriate part of  
122 the skull and a small slit (1–3 mm) was made in the dura to insert an electrode. Thalamic  
123 spiking activity was recorded from neurons in the LGN using a single-shaft multiprobe  
124 electrode (A1×32-Poly3-10mm-50-177; NeuroNexus, Ann Arbor, MI, USA). The electrode was  
125 equipped with 32 recording probes arranged in three columns at the tip; the center column had

126 12 probes and the left and right columns had 10 probes each. The distance between the centers  
127 of the adjacent recording probes was 50  $\mu\text{m}$ . The LGN electrode was inserted into the brain at  
128 4.5 mm posterior to the bregma and 5.6 mm lateral from the midline (Fig. 1A). The penetration  
129 angle was 30° in the coronal plane. A reference electrode was positioned on the surface of the  
130 scalp. LGN recordings were made at average intervals of 0.21 mm along a penetration and were  
131 typically performed three times per penetration.

132 The spiking activity and LFP from the VC was recorded using an eight-shank electrode  
133 (Buzsaki<sup>64</sup>; NeuroNexus). The distance between the centers of adjacent shanks was 200  $\mu\text{m}$ .  
134 Each shank was equipped with eight recording probes arranged in a V-shape at the tip. The  
135 distance between the centers of adjacent recording probes was 20–40  $\mu\text{m}$ . The center of the  
136 electrode for recording from the VC was located at 6.5 mm posterior to the bregma and 3 mm  
137 lateral from the midline (Fig. 1A). The electrode plane was parallel to the coronal plane. The  
138 penetration angle was adjusted so that the tips were parallel to the cortical surface as much as  
139 possible. A reference electrode was positioned on the surface of the scalp. Once the spiking  
140 activity was obtained from most of the shank, insertion of the cortical electrode was stopped and  
141 the position was maintained during recording.

142 Recordings from the LGN and VC were performed in the right hemisphere. Signals were  
143 amplified (10,000 $\times$ ), filtered (1.3–7,603.8 Hz), digitized (20,000 Hz; RHD 2000 amplifier  
144 board; Intan Technologies, Los Angeles, CA, USA), and stored in a personal computer for  
145 offline analysis.

146 Visual stimuli were presented to enhance spiking activity of LGN neurons and obtain a  
147 reliable STA-LFP from a limited recording duration. Visual stimuli were presented to the left



148 eye (i.e., contralateral to the recording hemisphere) in a bright room on a liquid crystal display  
149 (XL2546-B ZOWIE; BenQ, Taipei, Taiwan) placed 30 cm from the animal's left eye at 30°  
150 from the anterior-posterior body axis. The receptive field (RF) positions of the LGN and VC  
151 recording sites were qualitatively determined by monitoring the spiking activity of multiunits  
152 while manually presenting grating stimuli. Visual stimuli were presented to include the  
153 manually determined RFs. The stimulus set consisted of 200 one-dimensional noise square-  
154 wave gratings (spatial frequency, 0.016–0.15 cycles/°). Note that LGN and V1 neurons prefer a  
155 spatial frequency of 0.03–0.06 and 0.04–0.15 cycles/°, respectively (Girman et al., 1999; Sriram  
156 et al., 2016). The stimulus size was 108°×55° (horizontal × vertical). The gratings had one of  
157 four orientations (0°, 45°, 90°, or 135°) and were black and white. The luminance values of the  
158 black and white pixels were 1.0 cd/m<sup>2</sup> and 319 cd/m<sup>2</sup>, respectively. Each stimulus was presented  
159 20 times in a pseudo-random order for 0.5 s without an inter-stimulus interval. Thus, neural  
160 activity was recorded for approximately 30 min. The stimulus timing was recorded via a  
161 photodiode attached to the display. Saline was applied to the eyes before and after the recording  
162 of neural activity.

163 In 3 of 17 rats, neural activity was also recorded without visual stimuli (gray background,  
164 spontaneous activity) for approximately 30 min.

165

#### 166 *Data analysis*

167 Single unit activity was isolated offline using Kilosort (Pachitariu et al. 2016). Spike-sorting  
168 results were verified by calculating the auto-correlogram and the cross-correlogram (see Tamura  
169 et al., 2014 for details).

170 To perform STA-LFP, raw signals recorded from the VC were processed as follows. First,  
171 signals associated with the spiking activity of cortical neurons were removed from the raw  
172 signals. For this, the average spike waveform (3-ms duration) was calculated from the raw  
173 signals for each single unit recorded from the VC and the average spike waveform was  
174 subtracted from the raw signals. This process was repeated for all the isolated units recorded  
175 from the VC. Next, the spike-removed signals were low-pass filtered ( $<100$  Hz) and down-  
176 sampled from 20,000 Hz to 1,000 Hz. Finally, the z-score standardized LFP was calculated by  
177 subtracting the average and dividing with the standard deviation of the processed LFP.

178 To obtain the STA-LFP, the cross-correlation between the spike train of an LGN unit and  
179 the z-score standardized LFP recorded from the VC was calculated at a temporal resolution of 1  
180 ms with a temporal window of  $\pm 250$  ms (raw STA-LFP). Because visual stimulation can  
181 modulate the spiking activity of an LGN unit and LFP recorded from the VC, the effect of  
182 visual stimulation contaminates raw STA-LFP. The effect of visual stimulation was estimated by  
183 calculating the cross-correlation between the peristimulus time histogram (PSTH) of spiking  
184 activity of an LGN unit and the stimulus-triggered cortical LFP (PSTH-predictor). By  
185 subtracting the PSTH-predictor from the raw STA-LFP, the subtracted STA-LFP was obtained  
186 where the effect of visual stimulation was removed. This method was similar to that used for the  
187 cross-correlation analysis of spike trains collected during visual stimulation (Perkel et al., 1967;  
188 Toyama et al., 1981; Tamura et al., 2004). In the Results, the subtracted STA-LFP is presented  
189 as the STA-LFP unless otherwise specified. STA-LFP was calculated for all 64 LFPs recorded  
190 using 64 probes. The amplitude of STA-LFP was quantified by measuring its initial negative  
191 deflection. Statistical significance of the amplitude of STA-LFP was evaluated by comparing it

192 with that of STA-LFP triggered by a randomized spike train. The rationale was that if a  
193 relationship between LGN spike occurrence and LFP modulation was independent, the  
194 amplitude of STA-LFP obtained with an original spike train would be similar to that obtained  
195 with a randomized spike train. A randomized spike train was generated by randomizing the  
196 timing of spike occurrence. This process was repeated 10 times. The amplitude of the STA-LFP  
197 from the original spike train were statistically compared with the amplitude of STA-LFP from  
198 10 randomized spike trains ( $p < 0.05$ , signed-rank test, one-tailed).

199 The cross-correlation between the spike train of an LGN unit and that of a VC unit was  
200 calculated at a temporal resolution of 1 ms with a temporal window of  $\pm 250$  ms and obtained  
201 raw cross-correlogram (raw CCG). Because visual stimulation can modulate the spiking activity  
202 of an LGN unit and a VC unit, the effect of visual stimulation contaminates raw CCG. The  
203 effect of visual stimulation was estimated by calculating the cross-correlation between the  
204 PSTH of spiking activity of an LGN unit and that of a VC unit (PSTH-predicted CCG). By  
205 subtracting the PSTH-predicted CCG from the raw CCG, the subtracted CCG was obtained  
206 where the effect of visual stimulation was removed (Perkel et al., 1967; Toyama et al., 1981;  
207 Tamura et al., 2004). In the Results, the subtracted CCG is presented. Statistical significance of  
208 CCG peak was evaluated by comparing raw CCG with that of PSTH-predicted CCG ( $P <$   
209 0.0001, binomial test).

210

### 211 *Statistical analysis*

212 All data were pooled for statistical analyses. The number of units used for each experiment is  
213 described in the Results. All statistical analyses were performed using statistical software

214 (MATLAB; The MathWorks, Natick, MA, USA). The statistical threshold for  $p$ -values was set  
215 at 0.01 unless otherwise specified. Statistical outcomes (e.g., the chi-square [ $\chi^2$ ] value) are  
216 provided. The effect size for non-parametric tests between two groups was estimated using the  
217 formula:  $r = Z/\sqrt{N}$ ,  
218 where  $Z$  and  $N$  represent the  $Z$ -statistic from the signed-rank test and the number of samples,  
219 respectively.

220

## 221 **Results**

222 The present study was based on 4173 LGN units obtained from 47 recordings with visual  
223 stimulation and 713 LGN units obtained from 8 recordings without visual stimulation  
224 (spontaneous activity).

225 Spiking activity of an LGN unit induced clear modulation in LFP recorded from the VC.  
226 The spike train obtained from an LGN unit (Fig. 1B, top) was cross-correlated with the LFP  
227 recorded from the VC (Fig. 1B, bottom) to obtain raw STA-LFP (Fig. 1C, top, green line). By  
228 subtracting the PSTH-predictor (Fig. 1C, top, blue line) from the raw STA-LFP, the subtracted  
229 STA-LFP (Fig. 1C, top, black line) was obtained. The subtracted STA-LFP is presented as the  
230 STA-LFP unless otherwise specified. STA-LFP showed an initial negative deflection followed  
231 by a positive deflection. Most of the power of STA-LFP was in the low-frequency range (Fig.  
232 1C, bottom).

233 The amplitude of STA-LFP was weakly related to the physiological properties of LGN  
234 neurons. Here, LFPs with the largest amplitudes in the STA-LFP among the 64 LFPs recorded  
235 from 64 probes were selected for each LGN unit and subjected to analysis. If the negative peak

236 was not detected in STA-LFP, the unit was not included in the analysis. The average firing rate  
237 during the total recording period of an LGN unit was positively correlated with the amplitude of  
238 STA-LFP (Spearman's correlation coefficient,  $r = 0.15$ ,  $p = 3.70 \times 10^{-19}$ , number of units = 3335;  
239 Fig. 1D, top). Because the negative deflection of STA-LFP was quantified, a positive correlation  
240 indicated an LGN unit with a lower average firing rate tended to induce larger modulation in  
241 STA-LFP. The spike width that is the duration measured from the timing of initial negative nadir  
242 to that of the subsequent positive peak of an LGN unit was negatively correlated with the  
243 amplitude of STA-LFP (Spearman's correlation coefficient,  $r = -0.10$ ,  $p = 4.58 \times 10^{-9}$ , number of  
244 units = 3335; Fig. 1D, bottom). These results suggest that LGN neurons with a lower average  
245 firing rate and broader spike width tended to induce larger modulation in STA-LFP.

246 The statistical significance of the amplitude of STA-LFP was examined by comparing the  
247 amplitude of STA-LFP triggered by the original spike train with that triggered by a random  
248 spike train. The amplitude of the STA-LFP in Figure 1C (top, black line) is significantly larger  
249 than that calculated with random spike trains (top, gray lines;  $p < 0.05$ , signed-rank test, one-  
250 tailed). Among 4173 LGN units obtained with visual stimulation, 3152 LGN units (76%)  
251 evoked significant negative modulation in STA-LFP. Among 713 LGN units obtained without  
252 visual stimulation, 500 units (70%) evoked significant negative modulation in STA-LFP.

253 The amplitude of STA-LFP decreased only slightly with horizontal distance. The analysis  
254 was performed using LGN units with significant STA-LFPs. The largest amplitudes among  
255 eight STA-LFPs recorded from eight probes on a shank represented the shank. An example of  
256 STA-LFPs recorded from eight shanks of the cortical electrode is shown in the top panel of  
257 Figure 1E. Clear modulation in STA-LFP was not limited to signals recorded from a single

258 shank, but observed in those from all the eight shanks. The amplitude of STA-LFP recorded  
259 from a probe on the second shank (Fig. 1E, top, s2) was the largest, and that from the eighth  
260 shank (Fig. 1E, top, s8) was the smallest and was 83% of the maximum. The amplitude of STA-  
261 LFP decreased gradually from the peak with horizontal separation (Spearman's correlation  
262 coefficient,  $r = -0.73$ ,  $p \simeq 0$ ; Fig. 1E, middle), and the amplitude of STA-LFP recorded from the  
263 shank that was most distant from the peak shank was 67% of the maximum. The power of each  
264 frequency component ( $\delta$ , 1–3 Hz;  $\theta$ , 4–7 Hz;  $\alpha$ , 8–11 Hz;  $\beta$ , 12–29 Hz;  $\gamma$ , 30–250 Hz) of STA-  
265 LFP had a similar tendency (Fig. 1E, bottom).

266

267 \*\*\*\*\* **Figure 1 near here** \*\*\*\*\*

268

269 **The firing rate of LGN spikes is positively correlated with the amplitude of cortical LFP**

270 The relationship between the firing rate of spiking activity of LGN neurons during a short  
271 period and the amplitude of cortical LFP was examined. STA-LFP was calculated for each  
272 firing-rate group, which was defined according to the number of spikes of a single LGN unit  
273 within a window of 20 ms (i.e., one-spike/20 ms, two-spikes/20 ms, three-spikes/20 ms, and  
274 four-spikes/20 ms; Fig. 2A). A 20-ms window was selected because it is close to the half-width  
275 of thalamocortical input-evoked excitatory postsynaptic potential (Gil and Amitai, 1996) and the  
276 membrane time constant of layer 4 regular spiking neurons (Beirlein et al., 2003; Gabernet et  
277 al., 2005). The first spike during the 20-ms period was used as the trigger spike for LFP  
278 averaging (Fig. 2A, thick vertical lines). LGN units that evoked significant modulation in STA-  
279 LFP were included in the analyses if at least 50 triggering spikes were recorded for each firing-

280 rate group.

281 The firing rate of spiking activity of an LGN unit within a 20-ms period was positively  
282 related to the STA-LFP amplitude. A representative example is shown in Figure 2B. When four  
283 spikes were emitted by the LGN unit within a 20-ms period, the STA-LFP amplitude was  $-0.67$   
284 (a.u.) and was the largest (number of four-spikes/20 ms = 231; Fig. 2B, magenta line), whereas  
285 only one spike was emitted by the LGN unit within a 20-ms period, the amplitude of the STA-  
286 LFP was  $-0.25$  (a.u.) and was the smallest (number of one-spike/20 ms = 4978; Fig. 2B, red  
287 line). When two or three spikes were emitted by the LGN unit within a 20-ms period, the STA-  
288 LFP had intermediate amplitudes ( $-0.37$  (a.u.) for two-spikes/20 ms, number of two-spikes/20  
289 ms = 1608, Fig. 2B, green line;  $-0.51$  (a.u.) for three-spikes/20 ms, number of three-spikes/20  
290 ms = 666, Fig. 2B, blue line). The STA-LFP calculated with all spikes (number of spikes =  
291 11,430) of the LGN unit (all-spike STA-LFP) had an amplitude of  $-0.38$  (a.u.; Fig. 2B, black  
292 line).

293 This pattern was confirmed with the LGN unit population. For population analysis, the  
294 amplitude of the STA-LFP of an LGN unit was normalized to the amplitude of the STA-LFP  
295 calculated with all spikes of the LGN unit (all-spike STA-LFP; Fig. 2B, black line, as an  
296 example). Note that normalization of the negative amplitude of STA-LFP with the negative  
297 amplitude of all-spike STA-LFP resulted in a positive value. The normalized STA-LFP  
298 amplitude was the largest (median = 1.61; number of units = 615; Fig. 2C, top) when LGN units  
299 emitted four spikes within a 20-ms period (four-spikes/20 ms). By contrast, the normalized  
300 STA-LFP amplitude was the smallest (median = 0.86) when the LGN units emitted only one  
301 spike within a 20-ms period (one-spike/20 ms). The normalized STA-LFP amplitude differed

302 across the four firing-rate groups ( $p = 4.22 \times 10^{-65}$ ,  $\chi^2 = 302$ , number of units = 615, Friedman's  
303 test) and increased with the number of spikes within a 20-ms period. The normalized STA-LFP  
304 amplitude differed across the firing-rate groups for units that showed three spikes at most within  
305 a 20-ms period ( $p = 1.97 \times 10^{-76}$ ,  $\chi^2 = 349$ , number of units = 1467; Fig. 2C, middle) and for units  
306 that showed two spikes at most within a 20-ms period ( $p = 2.96 \times 10^{-30}$ ,  $\chi^2 = 131$ , number of units  
307 = 859; Fig. 2C, bottom). The normalized STA-LFP amplitude was the largest when the LGN  
308 units emitted the maximum number of spikes within a 20-ms period. A similar tendency was  
309 observed for spontaneous activity. These findings suggest that the firing rate of spiking activity  
310 of a single thalamic neuron within a short period was positively related to the degree of cortical  
311 activation.

312

313 \*\*\*\*\* **Figure 2 near here** \*\*\*\*\*

314

### 315 **Relationship between the intervals of LGN spikes and the amplitude of cortical LFP**

316 The relationship between the inter-spike interval (ISI) of a single LGN neuron and cortical LFP  
317 amplitude was examined. On the one hand, because the instantaneous firing rate is negatively  
318 related to ISI, a short interval between triggering and following spikes of an LGN neuron is  
319 expected to be associated with large amplitude cortical LFP. On the other hand, because the  
320 inhibitory current induced by FFI was decreased and the depression of excitatory synapses was  
321 alleviated during a long silent period of spiking activity, a long interval between the preceding  
322 and triggering spikes of an LGN neuron is expected to be associated with large amplitude STA-  
323 LFP. Each LGN spike was classified into one of five groups according to the ISIs (i.e., <20 ms,



324 20–100 ms, 100–200 ms, 200–500 ms, and  $\geq 500$  ms) between triggering and following spikes  
325 (following ISI; Fig 3A, left) or ISIs between preceding and triggering spikes (preceding ISI; Fig  
326 3B, left). Although the above analysis of firing rate was examined over a 20 ms-period, the  
327 analyses with ISI were performed using a longer time scale, because inhibitory current and  
328 synaptic depression have a relatively longer time scale. LGN units evoking significant  
329 modulation in STA-LFP and emitting at least 50 triggering spikes for each of the five ISI groups  
330 were used for the analysis (number of units = 2680). The STA-LFP amplitude was normalized  
331 to the amplitude of the all-spike STA-LFP.

332 The largest STA-LFP amplitude (median = 1.28) was induced by spikes with a following  
333 ISI of  $< 20$  ms (Fig. 3A, right). This finding is consistent with that obtained with firing rate  
334 during a 20-ms period (i.e., a higher firing rate during a 20-ms period of LGN spiking activity  
335 was associated with larger STA-LFP amplitude). The smallest (median = 0.91) was induced by  
336 spikes with a following ISI of 20–100 ms. The normalized STA-LFP amplitude differed across  
337 the five groups of following ISIs ( $p = 6.28 \times 10^{-204}$ ,  $\chi^2 = 948$ , number of units = 2680, Friedman's  
338 test). Results obtained with spontaneous activity were different. Although large STA-LFP  
339 amplitude (median = 1.69) was induced by spikes with a following ISI of  $< 20$  ms, the largest  
340 (median = 1.72) was induced by a following ISI of  $\geq 500$  ms. The smallest (median = 0.91) was  
341 induced by a following ISI of 100–200 ms. Although, the interval between the triggering and  
342 following spikes of an LGN unit affected the amplitudes of cortical LFP, the effect was small  
343 and inconsistent.

344

345 \*\*\*\*\* **Figure 3 near here** \*\*\*\*\*

346

347           Next, a similar analysis was performed but the relationship between preceding ISI  
348 (interval between preceding and triggering spikes) and STA-LFP amplitude was assessed. The  
349 normalized amplitude of the STA-LFP differed across the five preceding ISI groups ( $p \approx 0$ ,  $\chi^2 =$   
350 2865, number of units = 2680, Friedman's test; Fig. 3B, right). Spikes with a long preceding ISI  
351 ( $\geq 500$  ms) were associated with the largest normalized STA-LFP amplitude (median = 1.47).  
352 Spikes with a moderate preceding ISI (100–200 ms) were associated with the smallest  
353 normalized STA-LFP amplitude (median = 0.55; Fig. 3B). Similar results were obtained with  
354 spontaneous activity. These results suggest that the interval between the preceding and  
355 triggering spikes of an LGN unit have an impact on the amplitudes of cortical LFP.

356           LFP amplitude was more susceptible to the preceding ISIs than to the following ISIs. The  
357 range of normalized STA-LFP amplitudes across the ISI groups was quantified by calculating  
358 the difference between the maximum and minimum amplitudes of STA-LFP among the ISI  
359 groups. The range of the preceding ISI groups (1.69, median) was larger than that of the  
360 following ISI groups (1.31, median; effect size = 0.31,  $p = 2.72 \times 10^{-115}$ , number of units = 2680,  
361 signed-rank test), suggesting that the interval between preceding and triggering spikes has a  
362 larger effect on the degree of cortical activation than the interval between triggering and  
363 following spikes.

364

### 365 **The temporal patterns of LGN spikes are related to the amplitude of cortical LFP**

366 Because both preceding ISI and following ISI related to the STA-LFP amplitude, the  
367 relationship between combinations of preceding and following ISIs *and* the STA-LFP amplitude

368 was investigated. Triggering spikes of an LGN neuron were classified into 16 groups based on  
369 combinations of preceding ISI ( $<20$ , 20–100, 100–500, and  $\geq 500$  ms) and following ISI ( $<20$ ,  
370 20–100, 100–500, and  $\geq 500$  ms). Three examples of ISI combinations are shown in Fig. 4A.  
371 LGN units evoking a significant modulation in the STA-LFP and emitting at least 50 triggering  
372 spikes for each of the 16 ISI combinations were analyzed (number of units = 1216).

373 The normalized STA-LFP amplitude differed among the 16 ISI combinations. A  
374 representative example is shown in Figure 4B. When a triggering LGN spike was preceded by  
375 another spike with a long interval ( $\geq 500$  ms, preceding ISI) and followed by yet another spike  
376 with a short interval ( $<20$  ms, following ISI), the amplitude of the STA-LFP was the largest  
377 ( $-1.08$  (a.u.); number of spikes = 442; Fig. 4B, magenta line). The combination of a short  
378 preceding ISI ( $<20$  ms) and short following ISI ( $<20$  ms) induced STA-LFP with a moderate  
379 amplitude of  $-0.58$  (a.u.; number of spikes = 1667; Fig. 4B, purple line). A combination of  
380 moderate ISIs (preceding ISI, 100–500 ms; following ISI, 100–500 ms) was associated with the  
381 smallest STA-LFP amplitude ( $-0.13$  (a.u.); number of spikes = 916; Fig. 4B, cyan line). The  
382 STA-LFP calculated with all spikes (number of spikes = 11,430) of the LGN unit (all-spike  
383 STA-LFP) had an amplitude of  $-0.38$  (Fig. 4B, black line).

384 Dependence of the STA-LFP amplitude on ISI combinations was confirmed with the  
385 LGN unit population. When a triggering LGN spike was preceded by another spike with a long  
386 interval ( $\geq 500$  ms, preceding ISI) and followed by yet another spike with a short interval ( $<20$   
387 ms, following ISI), the largest normalized STA-LFP amplitude (STA-LFP amplitude normalized  
388 to the amplitude of the all-spike STA-LFP) was observed (median = 2.46; Fig. 4C). A  
389 combination of moderate ISIs (preceding ISI, 100–500 ms; following ISI, 100–500 ms) resulted

390 in the smallest normalized STA-LFP amplitude (median = 0.71). The normalized STA-LFP  
391 amplitude differed across the 16 ISI combinations ( $p \approx 0$ ,  $\chi^2 = 4434$ , number of units = 1216,  
392 Friedman's test).

393         Although the effect of following ISI on the amplitude of STA-LFP was weak in the  
394 previous analysis (see Relationship between the intervals of LGN spikes and the amplitude of  
395 cortical LFP), the effect of following ISI becomes obvious if analyzed in combination with the  
396 preceding ISI. For example, the largest normalized STA-LFP amplitude (median = 2.46) was  
397 observed with the long preceding ISI ( $\geq 500$  ms) and the short following ISI ( $< 20$  ms), while  
398 much smaller normalized STA-LFP amplitude (median = 1.57) was observed with the same  
399 long preceding ISI ( $\geq 500$  ms) but with a moderate following ISI (100–500 ms). It suggests that  
400 both preceding ISI and following ISI related to the degree of cortical activation.

401         If the firing rate during a short period of spiking activity of an LGN neuron is the only  
402 determinant of cortical LFP amplitude, the combination of short preceding and following ISIs is  
403 expected to result in the largest STA-LFP amplitude. Similarly, the combination of long  
404 preceding and following ISIs is likely to result in the smallest STA-LFP amplitude. However,  
405 the normalized STA-LFP amplitude induced by the combination of short preceding and  
406 following ISIs (median = 1.57) was not the largest, and the normalized STA-LFP amplitude  
407 induced by the combination of long preceding and following ISIs (median = 1.83) was not the  
408 smallest. These results suggest that the firing rate during a short period of spiking activity of an  
409 LGN neuron is not the only determinant of cortical LFP amplitude, but suggests the importance  
410 of temporal patterns appearing in three consecutive spikes (i.e., a combination of preceding ISI  
411 and following ISI) on the STA-LFP amplitude.

412

413 \*\*\*\*\* **Figure 4 near here** \*\*\*\*\*

414

415 The above results were obtained from neural activity recorded during visual stimulation.

416 The same analyses were performed on neural data obtained without visual stimuli (i.e.,

417 spontaneous activity), with qualitatively similar results. The normalized STA-LFP amplitude

418 differed across the 16 ISI combinations ( $p = 7.61 \times 10^{-259}$ ,  $\chi^2 = 1257$ , number of units = 166,

419 Friedman's test; Fig. 4D). The combination of a long preceding ISI ( $\geq 500$  ms) and a short

420 following ISI ( $< 20$  ms) was associated with the largest normalized STA-LFP amplitude (median

421 = 5.98). The combination of moderate ISIs (100–500 ms, preceding ISI; 100–500 ms, following

422 ISI) was associated with the smallest normalized STA-LFP amplitude (median = 0.17). Thus,

423 the relationship between temporal patterns of thalamic spiking activity and cortical LFP

424 amplitude was not limited to neural activity during sensory stimulation, but was also observed

425 during spontaneous neural activity.

426 To examine whether STA-LFP associated with a specific temporal pattern could be

427 explained by the linear summation of single-spike triggered STA-LFP, STA-LFP was

428 reconstructed by the summation of single spike triggered STA-LFP and compared with the

429 observed STA-LFP. This analysis focused on two ISI combinations: i) a long preceding ISI

430 ( $\geq 500$  ms) and short following ISI ( $< 20$  ms); and ii) a short preceding ISI ( $< 20$  ms) and a short

431 following ISI ( $< 20$  ms). The former induced STA-LFP with the largest amplitude whereas the

432 latter induced STA-LFP with a moderate amplitude, although the latter was accompanied by the

433 highest firing rate. The analysis was performed with raw STA-LFP, because the same PSTH-

434 predictor was subtracted from the original and reconstructed STA-LFPs.

435         If the STA-LFP was triggered by spikes with a long preceding ISI ( $\geq 500$  ms) and a short  
436 following ISI ( $< 20$  ms), the amplitude of the observed STA-LFP was slightly larger than that of  
437 the reconstructed STA-LFP. A representative example is shown in Figure 5A. The amplitude of  
438 the observed STA-LFP was  $-1.06$  (Fig. 5A, red line) and that of the reconstructed STA-LFP was  
439  $-0.73$  (Fig. 5A, blue line). This tendency was confirmed with the neuron population. The  
440 median normalized amplitude of the observed STA-LFP of the neuron population was  $2.92$   
441 (median), which was slightly larger than that of the reconstructed STA-LFP ( $2.29$ , median;  
442 effect size =  $0.16$ ,  $p = 9.49 \times 10^{-16}$ , number of units =  $1216$ , signed-rank test; Fig. 5B).

443         Contrary to the above results, the amplitude of the observed STA-LFP was smaller than  
444 that of the reconstructed STA-LFP if the STA-LFP was triggered by spikes with a short  
445 preceding ISI ( $< 20$  ms) and a short following ISI ( $< 20$  ms). A representative example is shown  
446 in Figure 5C. The amplitude of the observed STA-LFP of the LGN unit was  $-0.50$  (Fig. 5C, red  
447 line) and that of the reconstructed STA-LFP was  $-1.01$  (Fig. 5C, blue line). The median  
448 normalized amplitude of the observed STA-LFP of the neuron population was  $1.85$  (median)  
449 and was smaller than that of the reconstructed STA-LFP ( $3.32$ , median; effect size =  $0.40$ ,  $p =$   
450  $1.70 \times 10^{-86}$ , number of units =  $1216$ , signed-rank test; Fig. 5D). These results suggested that the  
451 amplitude of the STA-LFP associated with spikes with a long preceding ISI and a short  
452 following ISI could be explained by the linear or supralinear summation of single-spike  
453 triggered STA-LFP, whereas that associated with a short preceding ISI and a short following ISI  
454 could be explained by the sublinear summation of single-spike triggered STA-LFP.

455

456 \*\*\*\*\* **Figure 5 near here** \*\*\*\*\*

457

458           The amplitude of STA-LFP related to the firing rate during a 20-ms period and the largest  
459 STA-LFP amplitude were observed when triggered by the first spike of four spikes within a 20-  
460 ms period (Fig. 2). In addition, the amplitude of STA-LFP related to the temporal pattern of the  
461 spiking activity of an LGN unit and the largest STA-LFP amplitude were observed when  
462 triggered by spikes with a long preceding ISI ( $\geq 500$  ms) and a short following ISI ( $< 20$  ms)  
463 (Fig. 4). The normalized amplitude of STA-LFP triggered by two types of spikes (the first spike  
464 of four spikes in a 20-ms window and the spike with a long preceding ISI ( $\geq 500$  ms) and a short  
465 following ISI ( $< 20$  ms)) was directly compared. When the unit in Figure 2B emitted four spikes  
466 within a 20-ms period the STA-LFP amplitude was  $-0.67$  (a.u.) and when the same unit emitted  
467 spikes with a long preceding ISI ( $\geq 500$  ms) and a short following ISI ( $< 20$  ms), the amplitude of  
468 the STA-LFP was  $-1.08$  (a.u.; Fig. 4B). This comparison suggested the temporal pattern of  
469 spiking activity had a much larger effect on the amplitude of cortical LFP than the firing rate  
470 within a short period. This pattern was confirmed with the neuron population. The normalized  
471 amplitude of the STA-LFP of the latter ( $2.18$ , median; preceding ISI  $\geq 500$  ms and following ISI  
472  $< 20$  ms) was larger than that of the former ( $1.61$ , median; four spikes/20 ms; effect size =  $0.28$ ,  
473  $p = 1.20 \times 10^{-13}$ , number of units = 361, signed-rank test; Fig. 6). A temporal pattern appearing in  
474 three consecutive spikes had a much larger effect on the amplitude of the cortical LFP than the  
475 firing rate within a short period.

476

477 \*\*\*\*\* **Figure 6 near here** \*\*\*\*\*

478

479 **Spiking activity of cortical neurons and the temporal patterns of LGN spikes**

480 To examine whether cortical spiking activity is also related to temporal pattern of spiking  
481 activity of LGN neurons, the relationship between the temporal patterns of LGN spiking activity  
482 and occurrence of cortical spiking activity was analyzed using monosynaptically connected  
483 LGN-VC unit pairs. Monosynaptically connected LGN-VC unit pairs were detected with cross-  
484 correlation analysis of their spike trains. Cross-correlation analysis was performed with LGN-  
485 VC unit pairs each having  $\geq 5000$  spikes for reliable calculation of CCG ( $n = 86,292$  pairs). The  
486 criteria for monosynaptic excitatory connection was short latency (1–4 ms; Tanaka, 1983; Hata  
487 et al., 1990; Usrey et al., 2000; Tamura et al., 2004) significant peak ( $P < 0.0001$ , binomial test)  
488 in CCGs (Fig. 7A). Among the 86,292 LGN-VC unit pairs, 174 pairs showed the sign of  
489 monosynaptic connections.

490 Even for the monosynaptically connected LGN-VC unit pairs, not all the LGN spikes  
491 were followed by a VC spike with short latency. LGN spikes that were followed by a VC spike  
492 were designated as trigger spikes and other LGN spikes were designated as non-trigger spikes  
493 (Fig. 7B). To examine whether the trigger LGN spikes are associated with a specific  
494 combination of preceding and following ISIs, temporal patterns of three consecutive spikes  
495 around trigger spikes (preceding, triggering and following spikes) were compared with those  
496 around non-trigger spikes (preceding, non-triggering and following spikes). For this purpose,  
497 LGN spikes were further classified into 16 groups based on combinations of preceding ISI (<20,  
498 20–100, 100–500, and  $\geq 500$  ms) and following ISI (<20, 20–100, 100–500, and  $\geq 500$  ms) (Fig.  
499 7B). For each ISI combination, a spike index was calculated.



500 Spike index =  $(P_{\text{trigger}} - P_{\text{nontrigger}})/(P_{\text{trigger}} + P_{\text{nontrigger}})$ ,

501  $P_{\text{trigger}}$  is the proportion of spikes of a combination of preceding and following ISIs for trigger  
502 LGN spikes (spike count for the ISI combination divided by the number of trigger spikes), and  
503  $P_{\text{nontrigger}}$  is that for non-trigger LGN spikes (spike count for the ISI combination divided by the  
504 number of non-trigger spikes). Positive spike index means that the ISI combination appeared  
505 more frequently around trigger spikes than non-trigger spikes. Among the monosynaptically  
506 connected LGN-VC unit pairs, LGN units emitting  $\geq 300$  trigger and non-trigger spikes were  
507 analyzed (number of LGN-VC unit pairs, 38; the number of trigger LGN spikes, 300–752; the  
508 number of non-trigger LGN spikes, 4503–25,101).

509 The combination of a long preceding ISI ( $\geq 500$  ms) and a short following ISI ( $< 20$  ms)  
510 had a positive spike index. For example, a combination of moderate ISIs (preceding ISI,  
511 100–500 ms; following ISI, 100–500 ms) observed most frequently (16.6 percent and 18.2  
512 percent of trigger and non-trigger LGN spikes, respectively) in an LGN-VC unit pair (the  
513 number of trigger spikes, 386; the number of non-trigger spikes, 7837; Fig. 7C), and the spike  
514 index was negative (-0.06). The combination of a long preceding ISI ( $\geq 500$  ms) and a short  
515 following ISI ( $< 20$  ms) was observed in 4.9 percent and 1.9 percent of trigger and non-trigger  
516 spikes of the LGN unit, respectively, and results in the spike index of 0.43, meaning that the  
517 combination appeared more frequently around trigger spikes than non-trigger spikes of the LGN  
518 unit. The median of the spike index across LGN-VC unit pairs ( $n = 38$ ) for the combination of a  
519 long preceding ISI ( $\geq 500$  ms) and a short following ISI ( $< 20$  ms) was 0.054 (Fig. 7D). The  
520 spike index differed across the 16 ISI combinations ( $p = 1.55 \times 10^{-7}$ ,  $\chi^2 = 61.23$ , number of LGN-  
521 VC unit pairs = 38, Friedman's test). Furthermore, the median of spike index positively

522 correlated with the median of normalized amplitudes of STA-LFP calculated for combinations  
523 of preceding and following ISIs ( $r = 0.80$ ,  $p = 0.00034$ , number of ISI combinations = 16,  
524 Spearman's correlation coefficient; Fig. 7E; see Fig. 4C). The results suggest that cortical  
525 spiking activity is also related to the temporal pattern of three consecutive LGN spikes in a  
526 similar manner to cortical LFP.

527

528 \*\*\*\*\* **Figure 7 near here** \*\*\*\*\*

529

## 530 **Discussion**

531 The main finding of the present study is that a specific temporal pattern appearing in three  
532 consecutive spikes of an LGN neuron induced larger LFP modulation in VC than high-  
533 frequency spiking activity during a short period. The findings indicate the importance of the  
534 temporal pattern of spiking activity of a single thalamic neuron on cortical activation.

535

## 536 **Technical considerations**

537 In the present study, visual stimuli were presented to enhance spiking activity of LGN neurons  
538 and obtain reliable STA-LFP from a limited recording duration. Because presentation of visual  
539 stimuli modulates the firing rates of spiking activity of an LGN unit and cortical LFP almost  
540 simultaneously, the raw STA-LFP reflects the correlation related to the stimulus-locked  
541 modulation (stimulus coordination) *and* the correlation related to the interaction between the  
542 LGN unit and cortical LFP (neural correlation). The effect of stimulus coordination was  
543 estimated by calculating the PSTH-predicted STA-LFP and removed by subtracting the PSTH-

544 predicted STA-LFP from the raw STA-LFP. Spontaneous neural activity was also analyzed and  
545 demonstrated similar results. Therefore, any effect of visual stimulation on the present findings  
546 was small or negligible.

547       Animals were anesthetized with urethane and the head of the animal was fixed to achieve  
548 stable recordings with silicon microelectrodes. These procedures may have affected the  
549 interpretation of the present findings. However, no difference in thalamocortical transmission  
550 under different states of alertness (Stoelzel et al., 2009) and the response properties of neurons  
551 in the LGN and VC of anesthetized mice were previously reported to be qualitatively similar to  
552 those of awake animals (Durand et al., 2016). Although similar conclusions are likely to be  
553 obtained with awake and behaving animals, future studies in awake and behaving animals may  
554 be required.

555

#### 556 **STA-LFP and thalamocortical neuron**

557 In the present study, the LFP was recorded as a measure of cortical activity, and modulation in  
558 STA-LFP was observed in a wide cortical region ( $>1.4$  mm). The results may not be consistent  
559 with the lateral extent of a single thalamocortical axon terminal ( $<1.0$ mm, Raczkowski and  
560 Fitzpatrick, 1990). However, because LFP signals represent neural activity from a few-  
561 millimeter region of the cortex (Mitzdorf, 1987; Logothetis, 2003; Kreiman et al., 2006; Jin et  
562 al., 2008; Nauhaus et al., 2009; Kajikawa and Schroeder, 2011; Buzsáki et al., 2012; Pesaran et  
563 al., 2018), signals related to spiking activity of a single LGN neuron can be recorded from  
564 widespread cortical regions.

565       An LGN unit that induces modulation in cortical LFP is likely to be a thalamocortical

566 relay neuron (TC neuron). Neurons in the LGN are divided into TC neurons and local inhibitory  
567 interneurons. TC neurons form 90% of the LGN neurons in rodents (Guido, 2018), and have a  
568 slightly broader spike width and larger soma than interneurons (Williams et al., 1996). In the  
569 present study, a large proportion of LGN units evoked significant modulation in the STA-LFP.  
570 LGN units with a broader spike width and lower firing rate, which are signatures of a larger  
571 neuron in general, induced the larger modulation of the STA-LFP. These results are consistent  
572 with the notion that an LGN unit that induces a large modulation in the STA-LFP is a TC  
573 neuron.

574

#### 575 **Firing rate of thalamic spiking activity during a short period and cortical LFP**

576 There was positive correlation between the firing rate of spiking activity of an LGN unit  
577 during a short period and the LFP amplitude recorded from the VC. The temporal summation of  
578 the depolarizations induced by consecutive spikes of a single LGN neuron underlies this  
579 relationship. The result is consistent with a previous study reporting a potential temporal  
580 summation at thalamocortical synapses (Usrey et al., 2000), but may not be consistent with the  
581 presence of FFI and depression of excitatory thalamocortical synapses. FFI can be weakened by  
582 the repetitive activation of the thalamocortical pathway (i.e., depression of FFI; Gabernet et al.,  
583 2005), and the depression of FFI facilitates the temporal summation at the thalamocortical  
584 synapses.

585 Although high-frequency spiking activity during a short period of an LGN unit induced  
586 larger LFP modulation than single spiking activity, the increase in the LFP amplitude was  
587 limited. For example, one may expect that the amplitude of LFP induced by four consecutive

588 spikes was about four times that induced by a single spike. However the amplitude of LFP  
589 induced by four consecutive spikes was less than two times that induced by a single spike,  
590 suggesting that the temporal summation is not as effective as the expectation. Therefore, it is  
591 reasonable to conclude that FFI was not fully suppressed and depression of excitatory  
592 thalamocortical synapses was not fully recovered. High frequency spiking activity of a LGN  
593 neuron induced successive depolarization in cortical neurons under influence of FFI and  
594 depression of excitatory thalamocortical synapses, and results in a weak but larger  
595 depolarization than a single LGN spike.

596

#### 597 **Temporal pattern of thalamic spiking activity and cortical LFP**

598 Temporal pattern appearing in three consecutive spikes of an LGN unit was related to the STA-  
599 LFP amplitude as well as to spiking activity of cortical neurons. A large modulation of the STA-  
600 LFP was observed, if a triggering LGN spike was preceded by another spike with a long interval  
601 (long preceding ISI) and was followed by yet another spike with a short interval (short  
602 following ISI). Contrary, the combination of a moderate ISIs was associated with the smallest  
603 normalized STA-LFP amplitude. Consistent results were obtained with the analysis of spiking  
604 activity of a cortical unit receiving monosynaptic inputs from an LGN unit. Thus, it is  
605 concluded that combination of preceding ISI and following ISI related to the degree of cortical  
606 activation. Consistent with the present results, it has been show that the preceding ISI of a  
607 thalamic neuron are related to the degree of cortical activation (Swadlow and Gusev, 2001;  
608 Swadlow, 2002; Swadlow et al., 2002; Stoelzel et al., 2008; Stoelzel et al., 2009).

609 Importance of temporal pattern appearing in three consecutive spikes of an LGN neuron

610 on cortical activation is not simply reflecting the effect of firing rate of an LGN neuron on  
611 cortical activation. If the combination of short preceding and following ISIs induced the largest  
612 LFP modulation and the combination of long preceding and following ISIs induced the smallest  
613 LFP modulation, one may conclude that the firing rate of a thalamic neuron during a short  
614 period was the determinant of the degree of cortical activation. However, these were not the  
615 case, suggesting that the firing rate during a short period is not the only determinant of the  
616 degree of cortical activation. Furthermore, and more importantly, a temporal pattern appearing  
617 in three consecutive spikes of an LGN unit (long preceding ISI and short following ISI) induced  
618 larger cortical LFP modulation than high-frequency spiking activity during a short period,  
619 suggesting the importance of temporal pattern that is unrelated to firing rate of an LGN neuron  
620 on cortical activation.

621       The amplitude of the STA-LFP associated with spikes with a long preceding ISI and a  
622 short following ISI was explained by the linear or supralinear summation of single-spike  
623 triggered STA-LFP. During the long-preceding silent period of a LGN neuron, its  
624 thalamocortical excitatory synapses recovered from the depressed state and the inhibitory  
625 currents induced by FFI were decreased. Then, depolarization induced by triggering and  
626 following LGN spikes are effectively and (supra)linearly summated in cortical neurons.  
627 Contrary, the amplitude of the STA-LFP associated with spikes with a short preceding ISI and a  
628 short following ISI was explained by the sublinear summation of single-spike triggered STA-  
629 LFP. A spike induces excitatory currents as well as FFI currents in cortical neurons *and*  
630 depresses its related synapses. Then, LGN spikes following with short interval induce much  
631 smaller depolarization than the first and result in sublinear summation in cortical neurons. These

632 results can be interpreted that preceding ISI controls the gain of depolarization induced by  
633 following spikes.

634         Although the present results clarify the importance of temporal pattern appearing in  
635 consecutive spikes of a single thalamic neuron on the thalamocortical transmission, the results  
636 did not deny the contribution of spatial summation at the thalamocortical transmission.  
637 Synchronous spiking activity between thalamic neurons has been reported and implicated in  
638 thalamocortical synaptic transmission (Alonso et al., 1996; Roy and Alloway 2001; Bruno and  
639 Sakmann, 2006; Ito et al., 2010). Synchronous inputs from thalamic neurons are summated  
640 spatially and induce large depolarization in cortical neurons. The present results are not  
641 incompatible with the potential involvement of synchronous spikes but suggest that  
642 synchronous spikes are more effective if they occur in a specific temporal pattern.

643

644

645 **References**

- 646 Alonso JM, Usrey WM, Reid RC (1996) Precisely correlated firing in cells of the lateral  
647 geniculate nucleus. *Nature* 383:815-819.
- 648 Beierlein M, Gibson JR, Connors BW (2003) Two dynamically distinct inhibitory networks in  
649 layer 4 of the neocortex. *J Neurophysiol* 90:2987-3000.
- 650 Bereshpolova Y, Hei X, Alonso JM, Swadlow HA (2020) Three rules govern thalamocortical  
651 connectivity of fast-spike inhibitory interneurons in the visual cortex. *Elife* 9:e60102.
- 652 Brecht M, Sakmann B. (2002) Dynamic representation of whisker deflection by synaptic  
653 potentials in spiny stellate and pyramidal cells in the barrels and septa of layer 4 rat  
654 somatosensory cortex. *J. Physiol.* 543:49-70.
- 655 Bruno RM, Sakmann B (2006) Cortex is driven by weak but synchronously active  
656 thalamocortical synapses. *Science* 312:1622-1627.
- 657 Buzsáki G, Anastassiou CA, Koch C (2012) The origin of extracellular fields and currents--  
658 EEG, ECoG, LFP and spikes. *Nat Rev Neurosci* 13:407-420.
- 659 Chung S, Ferster D (1998) Strength and orientation tuning of the thalamic input to simple cells  
660 revealed by electrically evoked cortical suppression. *Neuron* 20:1177-1189.
- 661 Dewese MR, Zador AM (2004) Shared and private variability in the auditory cortex. *J*  
662 *Neurophysiol* 92:1840-1855.
- 663 Durand S, Iyer R, Mizuseki K, de Vries S, Mihalas S, Reid RC (2016) A comparison of visual  
664 response properties in the lateral geniculate nucleus and primary visual cortex of awake  
665 and anesthetized mice. *J Neurosci* 36:12144-12156.
- 666 Feldmeyer D, Lübke J, Silver RA, Sakmann B (2002) Synaptic connections between layer 4



- 667 spiny neurone-layer 2/3 pyramidal cell pairs in juvenile rat barrel cortex: physiology and  
668 anatomy of interlaminar signalling within a cortical column. *J Physiol* 538:803-822.
- 669 Ferster D, Chung S, Wheat H (1996) Orientation selectivity of thalamic input to simple cells of  
670 cat visual cortex. *Nature* 380:249-252.
- 671 Ferster D, Lindström S (1983) An intracellular analysis of geniculo-cortical connectivity in area  
672 17 of the cat. *J Physiol* 342:181-215.
- 673 Gabernet L, Jadhav SP, Feldman DE, Carandini M & Scanziani M (2005) Somatosensory  
674 integration controlled by dynamic thalamocortical feed-forward inhibition. *Neuron* 48:315-  
675 327.
- 676 Gil Z, Amitai Y (1996) Properties of convergent thalamocortical and intracortical synaptic  
677 potentials in single neurons of neocortex. *J Neurosci* 16:6567-6578.
- 678 Gil Z, Connors BW, Amitai Y (1997) Differential regulation of neocortical synapses by  
679 neuromodulators and activity. *Neuron* 19:679-686.
- 680 Gil Z, Connors BW, Amitai Y (1999) Efficacy of thalamocortical and intracortical synaptic  
681 connections: quanta, innervation, and reliability. *Neuron* 23:385-397.
- 682 Girman SV, Sauve Y, Lund RD (1999) Receptive field properties of single neurons in rat  
683 primary visual cortex *J Neurophysiol* 82:301-311.
- 684 Guido W (2018) Development, form, and function of the mouse visual thalamus. *J*  
685 *Neurophysiol* 120:211-225.
- 686 Hata Y, Tsumoto T, Sato H, Hagihara K, Tamura H (1990) Horizontal interactions between  
687 visual cortical neurons studied by cross-correlation analysis in the cat. *J Physiol* 441:593-  
688 614.

- 689 Ikezoe K, Tamura H, Kimura F, Fujita I (2012) Decorrelation of sensory-evoked neuronal  
690 responses in rat barrel cortex during postnatal development. *Neurosci Res* 73:312-320.
- 691 Ito H, Maldonado PE, Gray CM (2010) Dynamics of stimulus-evoked spike timing correlations  
692 in the cat lateral geniculate nucleus. *J Neurophysiol* 104:3276-3292.
- 693 Ji XY, Zingg B, Mesik L, Xiao Z, Zhang LI, Tao HW (2016) Thalamocortical innervation  
694 pattern in mouse auditory and visual cortex: laminar and cell-type specificity. *Cereb Cortex*  
695 26:2612-2625.
- 696 Jin JZ, Weng C, Yeh CI, Gordon JA, Ruthazer ES, Stryker MP, Swadlow HA, Alonso JM  
697 (2008) On and off domains of geniculate afferents in cat primary visual cortex. *Nat*  
698 *Neurosci* 11:88-94.
- 699 Kajikawa Y, Schroeder CE (2011) How local is the local field potential? *Neuron* 72:847-858.
- 700 Kimura F, Itami C, Ikezoe K, Tamura H, Fujita I, Yanagawa Y, Obata K, Ohshima M (2010)  
701 Fast activation of feedforward inhibitory neurons from thalamic input and its relevance to  
702 the regulation of spike sequences in the barrel cortex. *J Physiol* 588:2769-2787.
- 703 Kreiman G, Hung CP, Kraskov A, Quiroga RQ, Poggio T, DiCarlo JJ (2006) Object selectivity  
704 of local field potentials and spikes in the macaque inferior temporal cortex. *Neuron*  
705 49:433-445.
- 706 Li YT, Ibrahim LA, Liu BH, Zhang LI, Tao HW (2013) Linear transformation of  
707 thalamocortical input by intracortical excitation. *Nat Neurosci* 16:1324-1330.
- 708 Lien AD, Scanziani M (2013) Tuned thalamic excitation is amplified by visual cortical circuits.  
709 *Nat Neurosci* 16:1315-1323.
- 710 Lien AD, Scanziani M (2018) Cortical direction selectivity emerges at convergence of thalamic

- 711 synapses. *Nature* 558:80-86.
- 712 Liu BH, Wu GK, Arbuckle R, Tao HW, Zhang LI (2007) Defining cortical frequency tuning  
713 with recurrent excitatory circuitry. *Nat Neurosci* 10:1594-1600.
- 714 Logothetis NK (2003) The underpinnings of the BOLD functional magnetic resonance imaging  
715 signal. *J Neurosci* 23:3963-3971.
- 716 Magee JC (2000) Dendritic integration of excitatory synaptic input. *Nat Rev Neurosci* 1:181-  
717 190.
- 718 Mitzdorf U (1987) Properties of the evoked potential generators: current source-density analysis  
719 of visually evoked potentials in the cat cortex, *Int J Neurosci* 33:33-59.
- 720 Nauhaus I, Busse L, Carandini M, Ringach DL (2009) Stimulus contrast modulates functional  
721 connectivity in visual cortex. *Nat Neurosci* 12:70-76.
- 722 Okun M, Naim A, Lampl I (2010) The subthreshold relation between cortical local field  
723 potential and neuronal firing unveiled by intracellular recordings in awake rats. *J Neurosci*  
724 30:4440-4448.
- 725 Pachitariu M, Steinmetz N, Kadir S, Carandini M, Kennedy DH (2016) Kilosort: realtime spike-  
726 sorting for extracellular electrophysiology with hundreds of channels. *bioRxiv*, 061481.
- 727 Perkel DH, Gerstein GL, Moore GP (1967) Neuronal spike trains and stochastic point  
728 processes. II. Simultaneous spike trains. *Biophys J* 7:419-440.
- 729 Pesaran B, Vinck M, Einevoll GT, Sirota A, Fries P, Siegel M, Truccolo W, Schroeder CE,  
730 Srinivasan R (2018) Investigating large-scale brain dynamics using field potential  
731 recordings: analysis and interpretation. *Nat Neurosci* 21:903-919.
- 732 Poulet JF, Petersen CC (2008) Internal brain state regulates membrane potential synchrony in

- 733 barrel cortex of behaving mice. *Nature* 454:881-885.
- 734 Raczkowski D, Fitzpatrick D (1990) Terminal arbors of individual, physiologically identified  
735 geniculocortical axons in the tree shrew's striate cortex. *J Comp Neurol* 302:500-514.
- 736 Ringach DL (2021) Sparse thalamocortical convergence. *Curr Biol* 31:2199-2202.
- 737 Roy SA, Alloway KD (2001) Coincidence detection or temporal integration? What the neurons  
738 in somatosensory cortex are doing. *J Neurosci* 21:2462-2473.
- 739 Sedigh-Sarvestani M, Palmer LA, Contreras D (2019) Thalamocortical synapses in the cat  
740 visual system in vivo are weak and unreliable. *Elife* 8:e41925.
- 741 Sriram B, Meier PM, Reinagel P (2016) Temporal and spatial tuning of dorsal lateral geniculate  
742 nucleus neurons in unanesthetized rats. *J Neurophysiol* 115:2658-2671.
- 743 Stoelzel CR, Bereshpolova Y, Gusev AG, Swadlow HA (2008) The impact of an LGNd impulse  
744 on the awake visual cortex: synaptic dynamics and the sustained/transient distinction. *J*  
745 *Neurosci* 28:5018-5028.
- 746 Stoelzel CR, Bereshpolova Y, Swadlow HA (2009) Stability of thalamocortical synaptic  
747 transmission across awake brain states. *J Neurosci* 29:6851-6859.
- 748 Stratford KJ, Tarczy-Hornoch K, Martin KA, Bannister NJ, Jack JJ (1996) Excitatory synaptic  
749 inputs to spiny stellate cells in cat visual cortex. *Nature* 382:258-261.
- 750 Swadlow HA (2002) Thalamocortical control of feed-forward inhibition in awake  
751 somatosensory 'barrel' cortex. *Philos Trans R Soc Lond B Biol Sci* 357:1717-1727.
- 752 Swadlow HA, Gusev AG (2001) The impact of 'bursting' thalamic impulses at a neocortical  
753 synapse. *Nat Neurosci* 4:402-408.
- 754 Swadlow HA, Gusev AG, Bezdudnaya T (2002) Activation of a cortical column by a

- 755           thalamocortical impulse. *J Neurosci* 22:7766-7773.
- 756    Tamura H, Kaneko H, Kawasaki K, Fujita I (2004) Presumed inhibitory neurons in the macaque  
757           inferior temporal cortex: visual response properties and functional interactions with  
758           adjacent neurons. *J Neurophysiol* 91:2782-2796.
- 759    Tamura H, Mori Y, Kaneko H (2014) Organization of local horizontal functional interactions  
760           between neurons in the inferior temporal cortex of macaque monkeys. *J Neurophysiol*  
761           111:2589-2602.
- 762    Tanaka K (1983) Cross-correlation analysis of geniculostriate neuronal relationships in cats. *J*  
763           *Neurophysiol* 49:1303-1318.
- 764    Toyama K, Kimura M, Tanaka K (1981) Cross-correlation analysis of interneuronal  
765           connectivity in cat visual cortex. *J Neurophysiol* 46:191-201.
- 766    Usrey WM, Alonso JM, Reid RC (2000) Synaptic interactions between thalamic inputs to  
767           simple cells in cat visual cortex. *J Neurosci* 20:5461-5467.
- 768    Williams SR, Turner JP, Anderson CM, Crunelli V (1996) Electrophysiological and  
769           morphological properties of interneurons in the rat dorsal lateral geniculate nucleus in  
770           vitro. *J Physiol* 490:129-147.
- 771

772 **Figure Legends**

773

774 **Figure 1.** The lateral geniculate nucleus (LGN) neuron spike-triggered average (STA) of the  
775 cortical local field potential (LFP). **A**, Schematic representation of the recording configuration.  
776 The electrodes for LGN and the visual cortex recordings are depicted on coronal sections of a  
777 rat brain. Note that the brain sections and the two electrodes are not drawn to the exact scale for  
778 illustrative purposes. **B**, An example of a spike train of an LGN unit (top) and simultaneously  
779 recorded cortical LFP (bottom). The vertical lines in the top panel show the timing of the LGN  
780 spikes. If a spike occurs  $Y = 1$ , otherwise  $Y = 0$ . The presented cortical LFP was spike-removed,  
781 low-pass filtered, down-sampled, and z-score transformed. **C**, Top: an example of STA-LFP.  
782 The green, blue, and black lines represent the raw STA-LFP, peristimulus time histogram-  
783 predicted STA-LFP, and subtracted STA-LFP, respectively. The ten gray lines represent raw  
784 STA-LFPs calculated with ten randomized spike trains. Average amplitudes from  $-250$  to  $-200$   
785 ms were subtracted to align the signals. The vertical dashed line at  $0$  ms represents the timing of  
786 the triggering-LGN spike. The horizontal dashed line indicates zero amplitude. Bottom: power  
787 spectra of the subtracted STA-LFP in the top panel. **D**, Top: relationship between the average  
788 firing rate during the total recording period of an LGN unit and the STA-LFP amplitude. Each  
789 dot represents a single LGN unit. The red dashed line represents a linear regression. Bottom:  
790 relationship between the spike width of an LGN unit and the STA-LFP amplitude. **E**, Top: an  
791 example of STA-LFPs recorded from the eight shanks (s1–s8) of a cortical electrode. Middle:  
792 relationships between the horizontal distance from the shank (peak shank) that recorded the  
793 STA-LFP with the maximum amplitude *and* STA-LFP amplitude. In the box plot, the center of

794 each box (black horizontal lines) represents the median across LGN units, whereas the top and  
795 bottom of the box represent the upper and lower quartiles, respectively. The attached whiskers  
796 connect the most extreme values within 150% of the interquartile range from the end of each  
797 box. Bottom: relationships between the horizontal distance and power of each frequency  
798 component of STA-LFP (blue,  $\delta$  (1–3 Hz); orange,  $\theta$  (4–7 Hz); yellow,  $\alpha$  (8–11 Hz); purple,  
799  $\beta$  (12–29 Hz); green,  $\gamma$  (30–250 Hz)). The median across LGN units was plotted.

800

801 **Figure 2.** Relationship between the firing rates of a lateral geniculate nucleus (LGN) neuron  
802 during a 20-ms period and the cortical local field potential (LFP) amplitude. **A**, Triggering  
803 spikes of an LGN unit were classified into one of four firing-rate groups according to the  
804 number of spikes within a 20-ms period (one spike, two spikes, three spikes, and four spikes).  
805 The triggering spike was the first spike within a 20-ms period (indicated by thick vertical lines  
806 at time zero). The black horizontal bar at the top represents the 20-ms period. **B**, An example of  
807 spike-triggered average (STA)-LFPs calculated with an LGN unit for each firing-rate group  
808 (red, one spike; green, two spikes; blue, three spikes; magenta, four spikes). The STA-LFP  
809 calculated with all spikes of the LGN unit was also plotted (black line). **C**, Comparisons of the  
810 normalized STA-LFP amplitude across the firing-rate groups. Top: comparison of the  
811 normalized STA-LFP amplitude across the four firing-rate groups with LGN units that evoked  
812 four spikes at most within the 20-ms period. Middle: comparison of the normalized STA-LFP  
813 amplitude across the three firing-rate groups with LGN units that evoked three spikes at most  
814 within the 20-ms period. Bottom: comparison of the normalized STA-LFP amplitude across the  
815 two firing-rate groups with LGN units that evoked two spikes at most within the 20-ms period.

816 The horizontal dashed lines represent the normalized amplitudes equal to one (i.e., same as the  
817 amplitude of the STA-LFP calculated with all spikes). Other conventions are as in Fig. 1.

818

819 **Figure 3.** Relationship between the inter-spike interval (ISI) of spiking activity of a lateral  
820 geniculate nucleus (LGN) neuron and the amplitude of cortical local field potential (LFP). **A**,  
821 Left: schematic depiction of intervals between triggering and following LGN spikes (following  
822 ISI, <20, 20–100, 100–200, 200–500, and  $\geq 500$  ms). ISI time windows are represented by pale  
823 cyan strips. The thick cyan vertical lines at time zero represent the timing of the triggering spike  
824 and the thin cyan vertical lines represent an example of timing of a following spike. Right:  
825 relationship between the following ISI and the normalized STA-LFP amplitude. **B**, Left:  
826 schematic depiction of intervals between preceding and triggering LGN spikes (preceding ISI,  
827 <20, 20–100, 100–200, 200–500, and  $\geq 500$  ms). Right: relationship between preceding ISI and  
828 the normalized STA-LFP amplitude. Other conventions are as in Figs. 1 and 2.

829

830 **Figure 4.** Relationship between the temporal pattern appearing in three consecutive spikes of a  
831 lateral geniculate nucleus (LGN) neuron and the amplitude of cortical local field potential  
832 (LFP). **A**, Schematic depiction of three examples of a temporal pattern appearing in three  
833 consecutive spikes. Top (magenta): a long preceding inter-spike interval (ISI) ( $\geq 500$  ms) with a  
834 short following ISI (<20 ms). Middle: (purple), a short preceding ISI (<20 ms) with a short  
835 following ISI (<20 ms). Bottom (cyan): a modest preceding ISI (100–500 ms) with a modest  
836 following ISI (100–500 ms). **B**, An example of spike-triggered average (STA)-LFPs calculated  
837 for the three representative temporal patterns (magenta, a long preceding ISI ( $\geq 500$  ms) and a



838 short following ISI ( $<20$  ms); purple, a short preceding ISI ( $<20$  ms) and a short following ISI  
839 ( $<20$  ms); cyan, a modest preceding ISI (100–500 ms) and a modest following ISI (100–500  
840 ms)). The STA-LFP calculated with all spikes of the LGN unit (all-spike STA-LFP) was also  
841 plotted (black). This LGN unit is the same as that in Fig. 2B. **C**, The median of the normalized  
842 STA-LFP amplitude for the 16 ISI combinations calculated using neural activity recorded  
843 during visual stimulation. The preceding ISI was plotted on the horizontal axis, the following  
844 ISI was plotted on the vertical axis, and the median of the normalized LFP amplitude was color-  
845 coded. **D**, The median of the normalized STA-LFP amplitude for the 16 ISI combinations  
846 calculated using spontaneous activity. Other conventions are as in Figs. 1 and 3.

847

848 **Figure 5.** Comparison of the observed spike-triggered average (STA) of cortical local field  
849 potential (LFP) and reconstructed STA-LFP. **A**, An example of the observed STA-LFP (red line)  
850 and reconstructed STA-LFP (blue line) for a temporal pattern with a long preceding ISI ( $\geq 500$   
851 ms) and a short following ISI ( $<20$  ms). This LGN unit is the same as that in Fig. 4B. **B**,  
852 Comparison between the normalized amplitude of the observed STA-LFP and that of the  
853 reconstructed STA-LFP for a temporal pattern with a long preceding ISI ( $\geq 500$  ms) and a short  
854 following ISI ( $<20$  ms). Each dot represents a single LGN unit. The horizontal and vertical  
855 dashed lines represent the normalized amplitudes equal to one (i.e., same as the amplitude of the  
856 STA-LFP calculated with all the spikes). The diagonal dashed line represents equality. The red  
857 cross represents the medians. **C**, An example of the observed STA-LFP (red line) and  
858 reconstructed STA-LFP (blue line) for a temporal pattern with a short preceding ISI ( $<20$  ms)  
859 and a short following ISI ( $<20$  ms). This LGN unit is the same as that in A. **D**, Comparison

860 between the normalized amplitude of the observed STA-LFP and the reconstructed STA-LFP for  
861 a temporal pattern with a short preceding ISI ( $<20$  ms) and a short following ISI ( $<20$  ms).

862 Other conventions are as in Fig. 1.

863

864 **Figure 6.** Comparison between the normalized amplitude of the spike-triggered average of local  
865 field potential induced by four spikes within a 20-ms period and that induced by a temporal  
866 pattern of spikes with a long preceding inter-spike interval ( $\geq 500$  ms) and a short following  
867 inter-spike interval ( $<20$  ms). Other conventions are as in Fig. 5.

868

869 **Figure 7.** Relationship between spiking activity of a visual cortex (VC) unit and the temporal  
870 pattern of spiking activity of a lateral geniculate nucleus (LGN) unit. **A**, Cross-correlograms  
871 (CCGs) of 38 LGN-VC unit pairs with short latency delayed peak, which suggests the  
872 monosynaptic excitatory connections from an LGN unit to a VC unit. Spike timing of a VC unit  
873 were plotted relative to spike timing of an LGN unit. Spike counts were normalized with the  
874 peak count. Top: color-coded CCGs for the 38 LGN-VC unit pairs. Each row corresponds to the  
875 CCG of a single LGN-VC unit pair. CCGs were displayed in no particular order. The  
876 normalized spike counts were color-coded. Bottom: the average of peak-normalized CCGs  
877 across the 38 pairs. Shading represents standard deviation. The vertical dashed line at the 0 ms  
878 represents the timing of LGN spikes. **B**, Schematic depiction of classification of spikes of an  
879 LGN unit. A spike train of a VC unit (top) and an LGN unit (bottom). Each LGN spike was  
880 classified into triggering spike (magenta; an LGN spike followed by a VC spike with short  
881 latency of 1–4 ms) and non-triggering spike (cyan). The LGN spikes were further classified into

882 16 groups based on combination of preceding ISI (<20, 20–100, 100–500, and  $\geq$ 500 ms) and  
883 following ISI (<20, 20–100, 100–500, and  $\geq$ 500 ms). **C**, An example of spike count proportion  
884 calculated with trigger spike (left) and non-trigger spike (middle) and the spikes index (right)  
885 for the 16 ISI combinations. Proportions of spike count (left and middle) and the spike index  
886 (right) were color-coded. **D**, The median of the spike index across 38 LGN-VC unit pairs for the  
887 16 ISI combinations. The median of the spike index was color-coded. **E**, Relationship between  
888 the median of the spike index and the median of the normalized STA-LFP amplitude. Each dot  
889 represents a single ISI combination. Other conventions are as in Fig. 4.

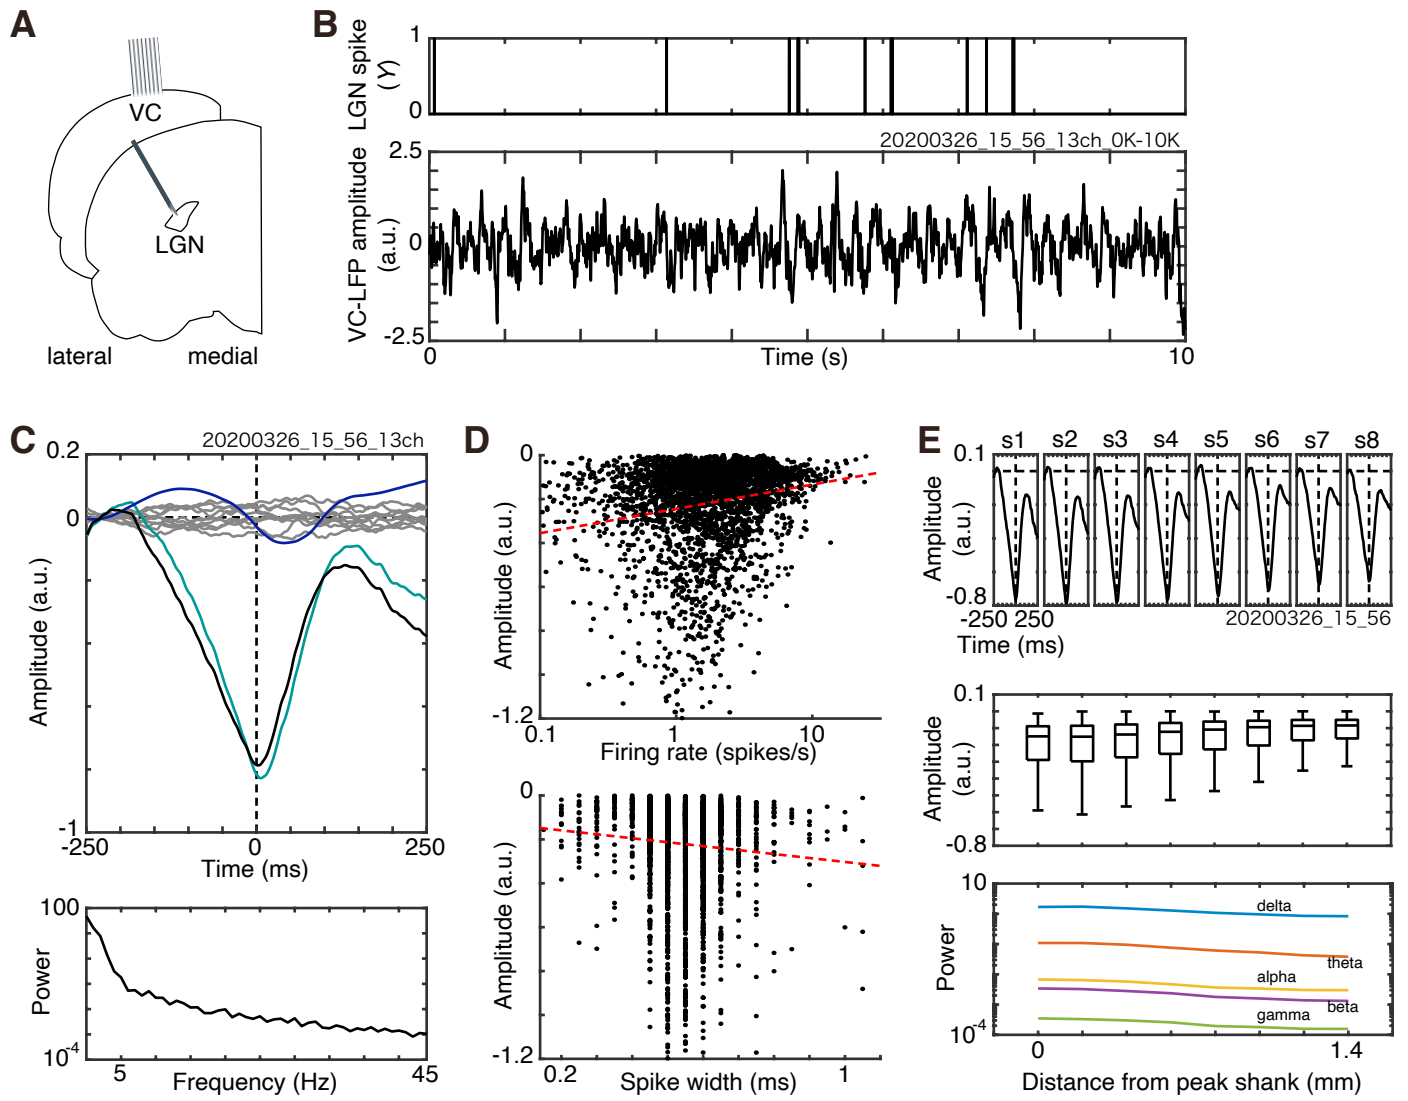

Figure 1  
Tamura

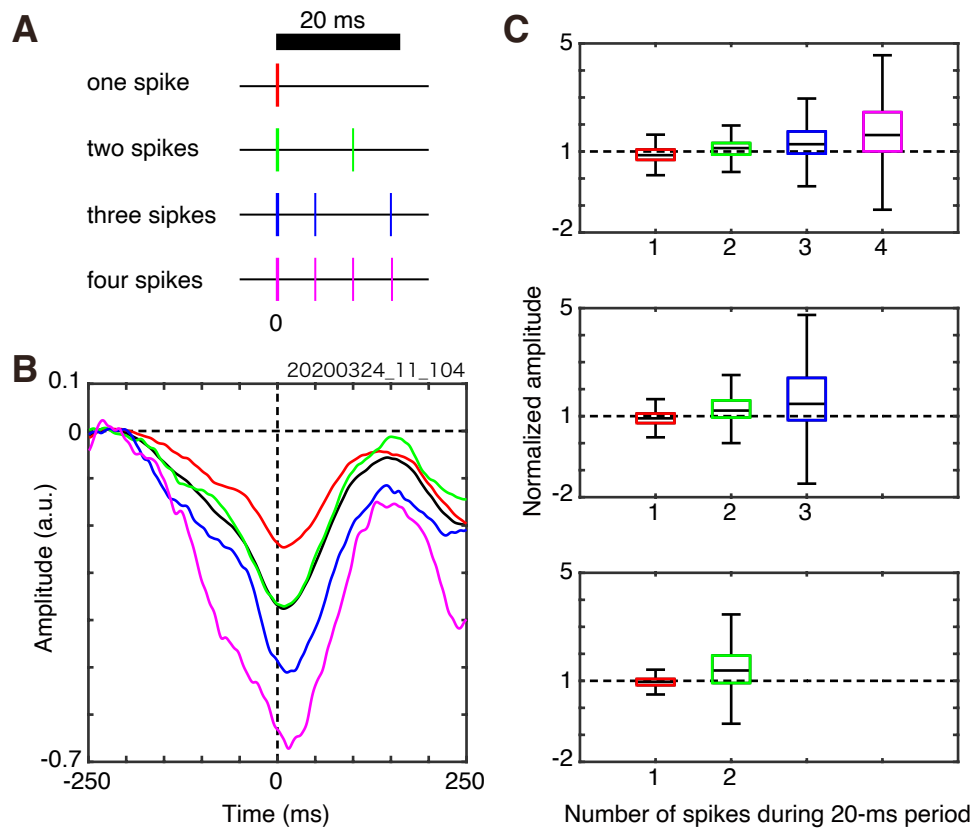

Figure 2  
Tamura

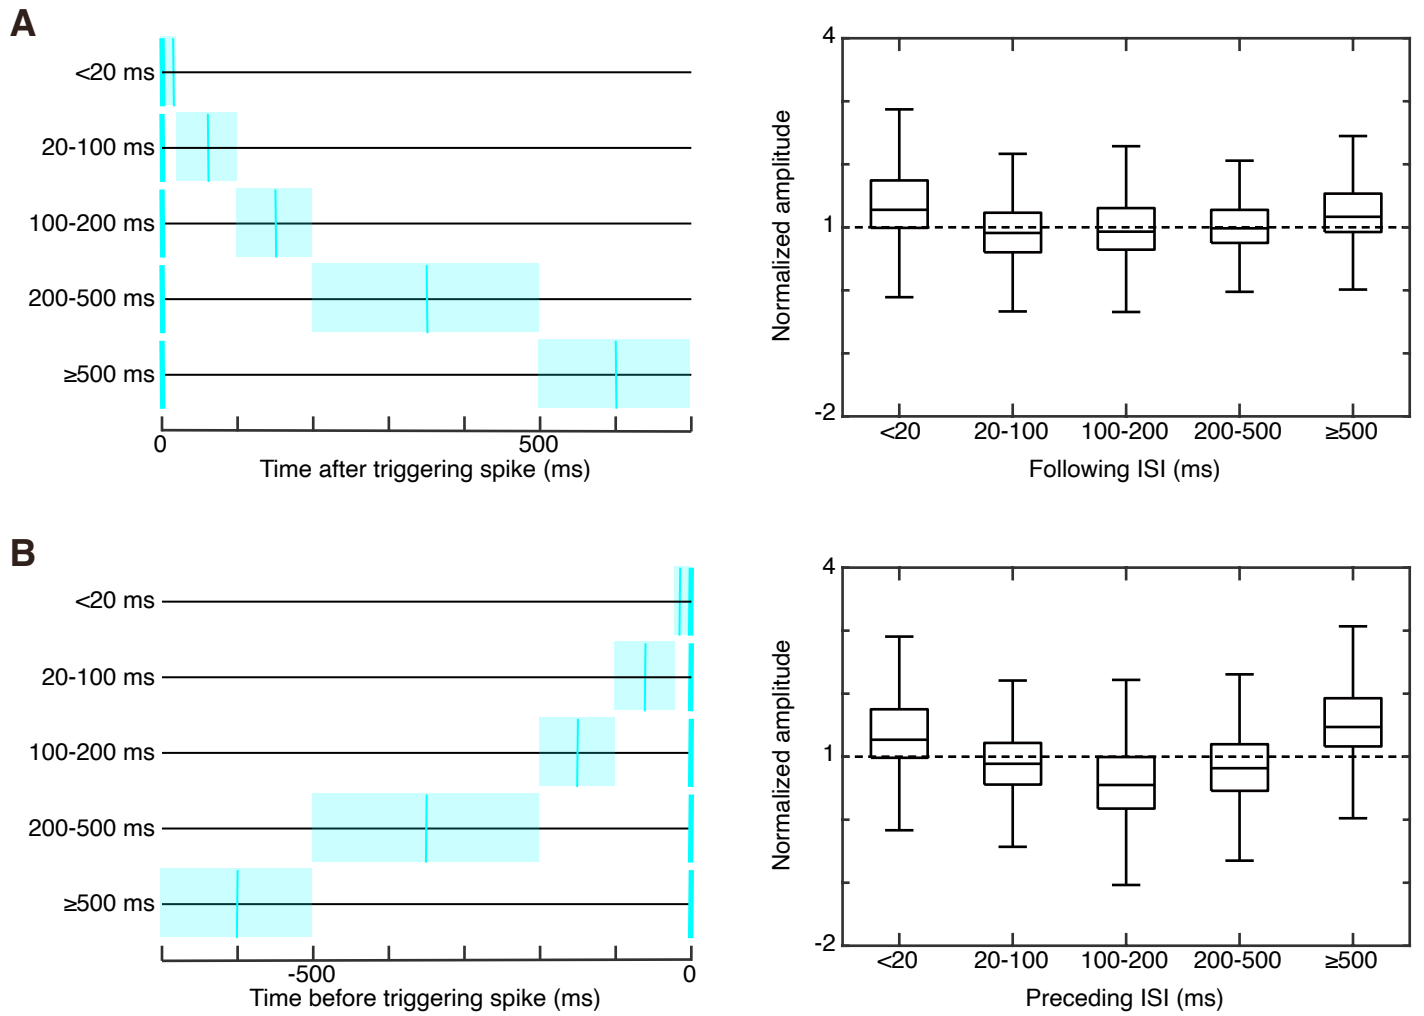

Figure 3  
Tamura

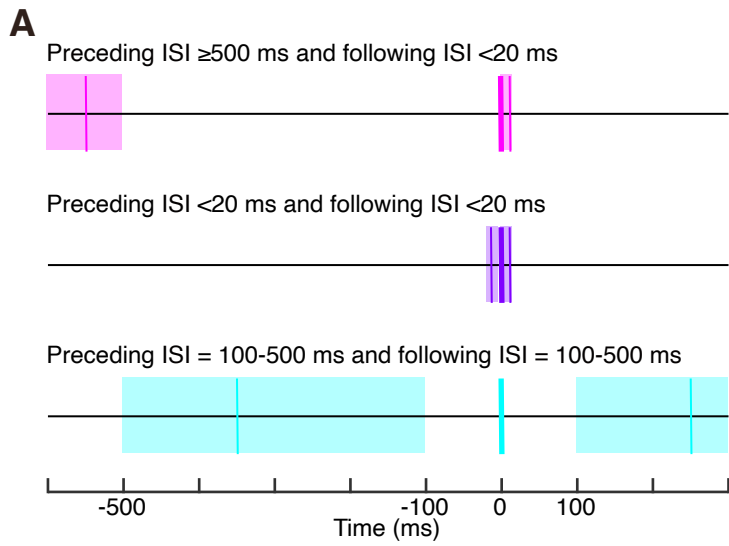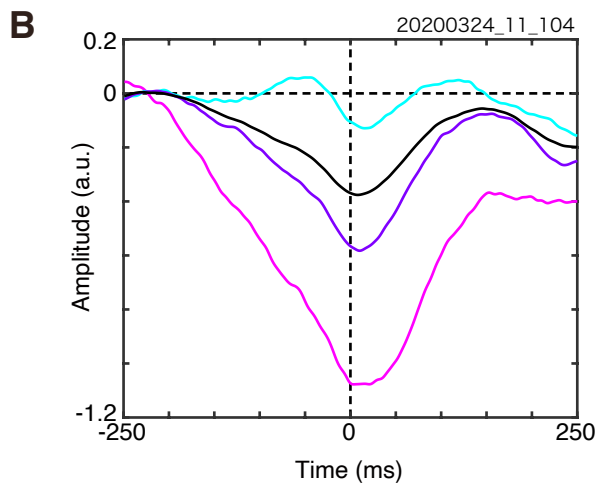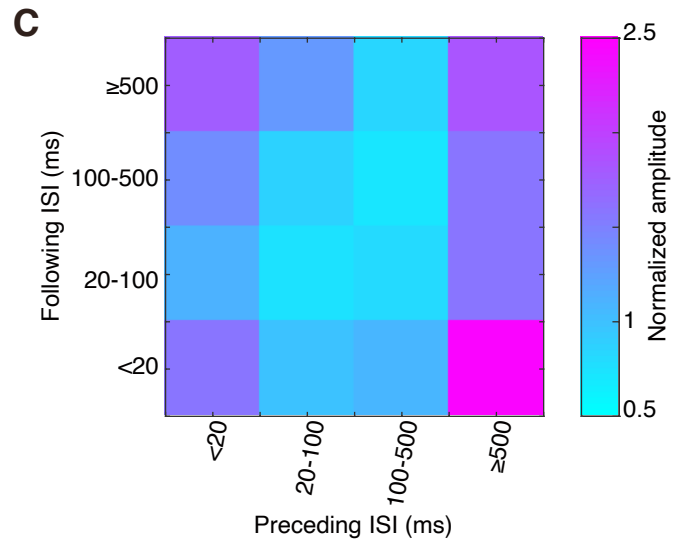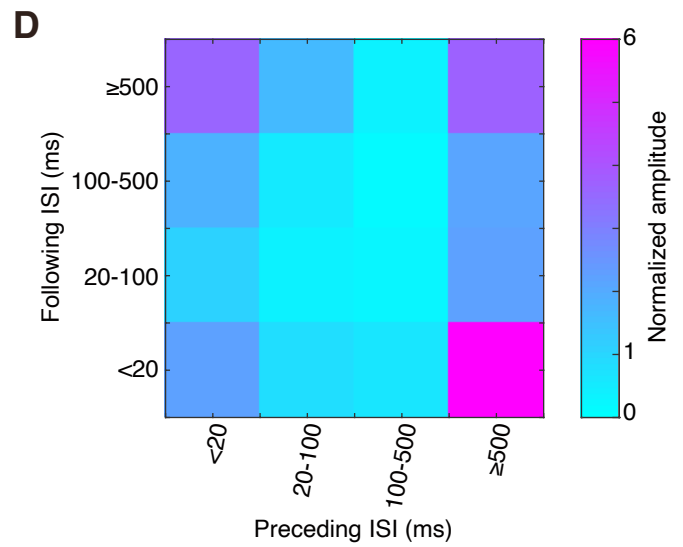

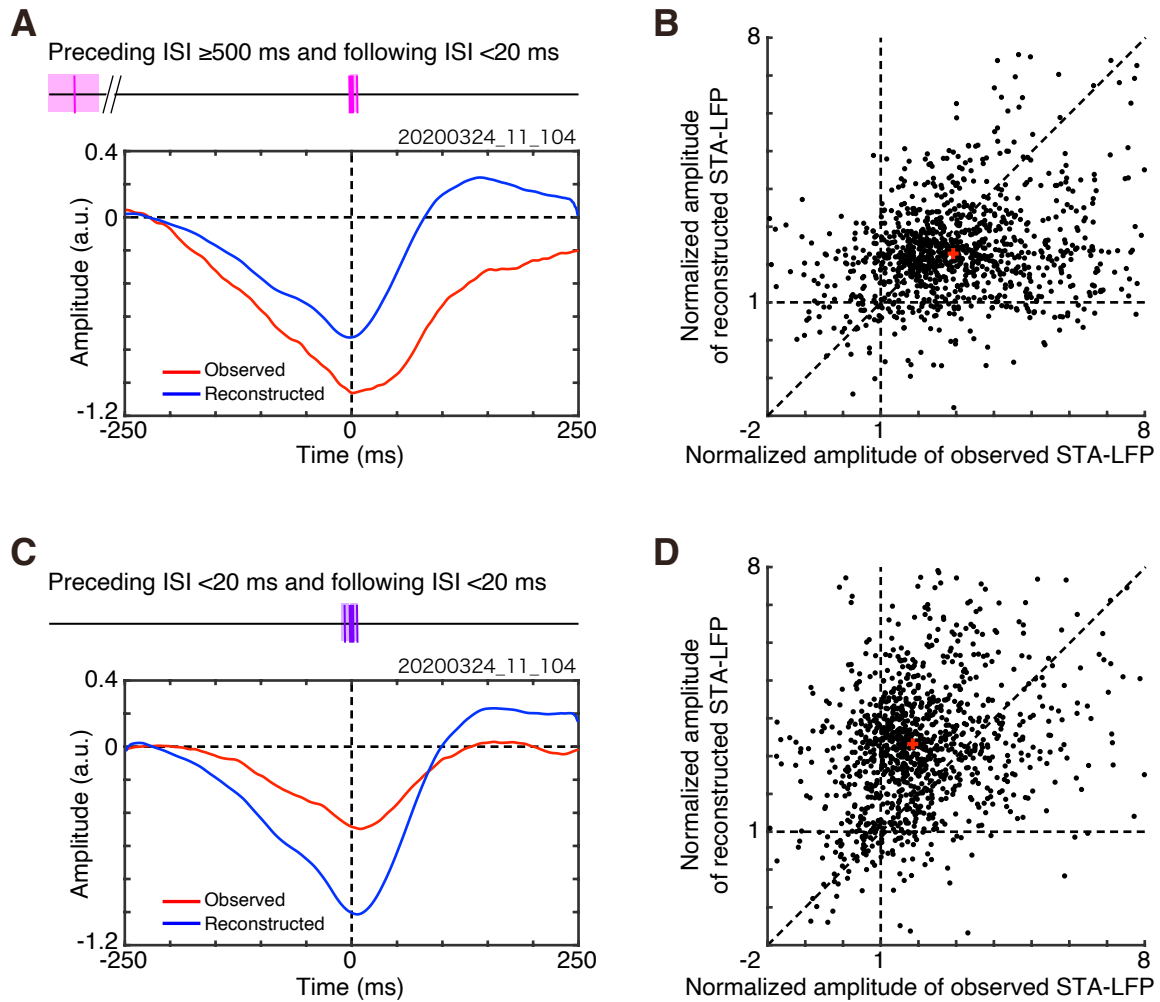

Figure 5  
Tamura



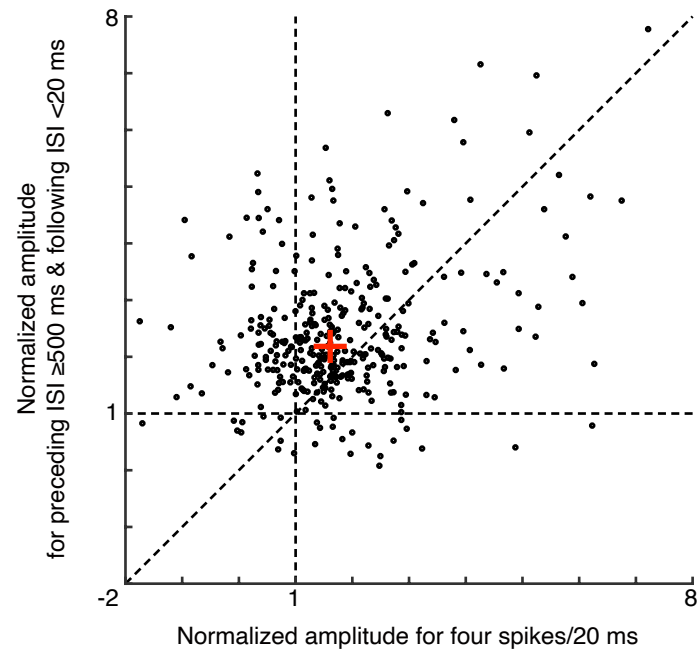

Figure 6  
Tamura

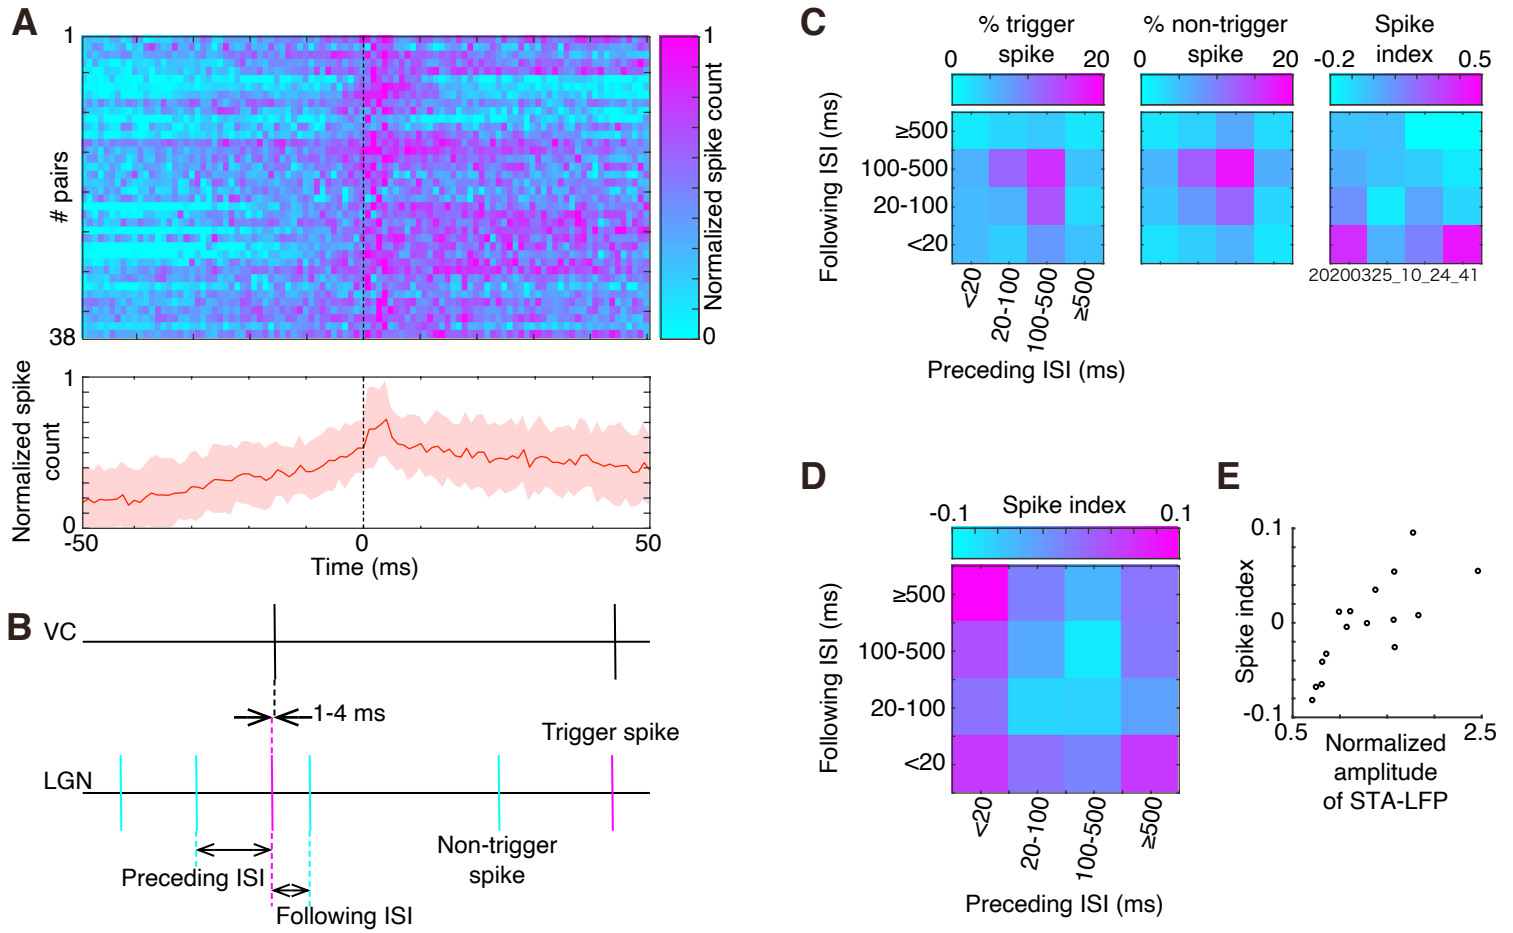

Figure 7  
Tamura
